# Supplementary material
Source: Research Square preprint supplement (doi:10.21203/rs.3.rs-8357640/v1)
Supplement: Supplementary file 1 [file efa790bad46fcc74011d0615.docx]

***Supporting Information***

Investigating Civilian Nitrocellulose in tuning performance of Nitramine Gun Propellant via a Combined Experimental and Theoretical calculation

Heng Gao†‡∭, Ling Chen†‡∭, Shouyu Wang†‡∭, Peichen Han†‡∭, Fengqiang Nan†‡∭*, Ping Du†‡∭*, and Weidong He†‡∭*

† School of Chemistry and Chemical Engineering, Nanjing University of Science and Technology, Nanjing, Jiangsu, 210094, China;

‡ Key Laboratory of Special Energy Materials, Ministry of Education, Nanjing, Jiangsu, 210094, China；

∭ National special materials resource and green disposal technology innovation center, Nanjing, Jiangsu, 210094, China；

Corresponding Email: dp1314@163.com; nfq@163.com; [hewedong@njust.edu.cn](mailto:hewedong@njust.edu.cn).

**Total number of pages: 13 (S1-S13)**

**Total number of figures: 10 (Figure S1- Figure S10)**

**Total number of equations: 1 (Eq S1)**

# 1. Curves of MS


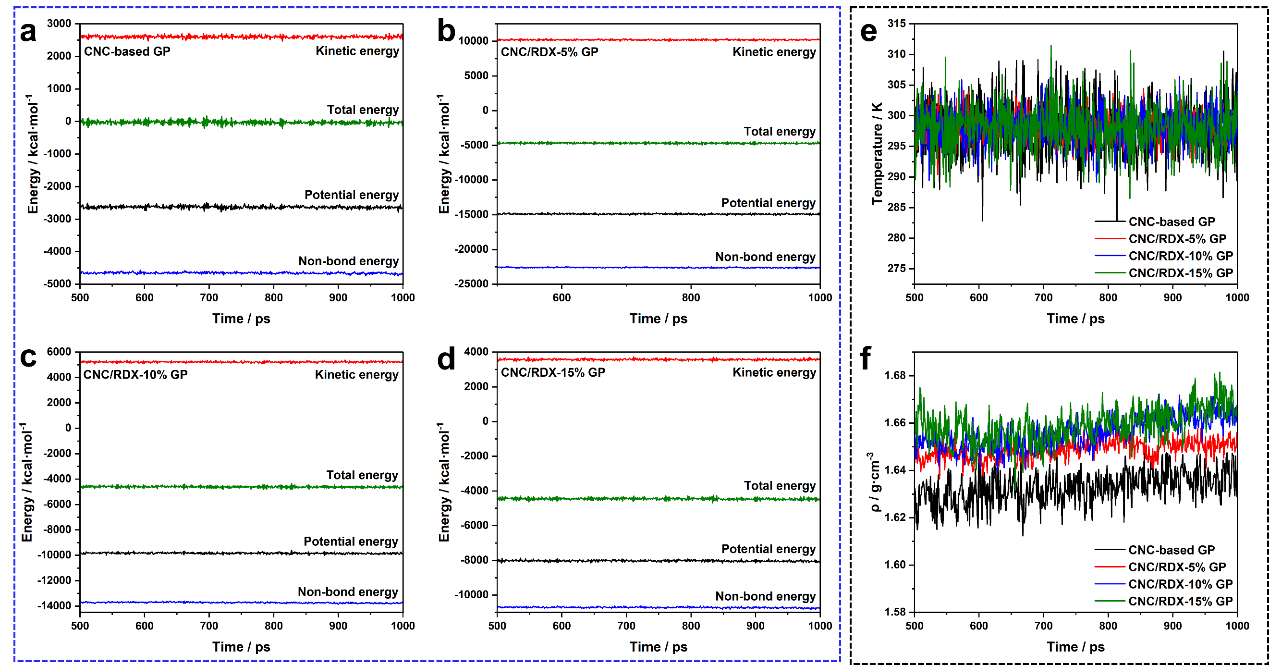


**Fig. S1.** The curves of total energy, kinetic energy, potential energy and non-bond energy (a-d), temperature (d), density (e), of CNC/RDX GP with simulation time.

# 2. SEM images


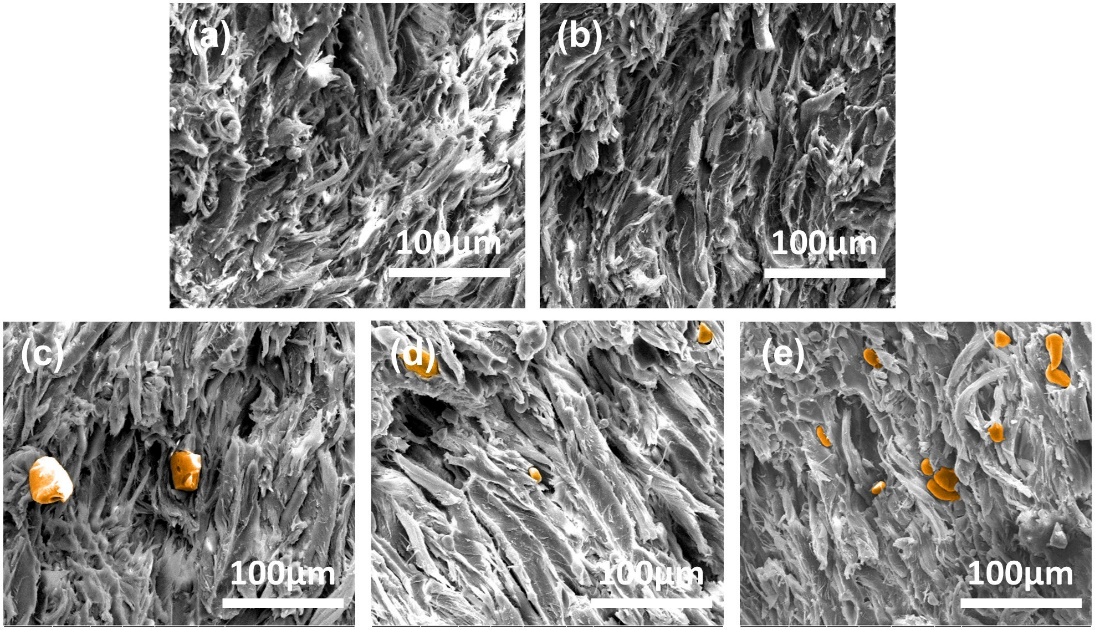


Fig. S2. The SEM images of the transverse section of obtained CNC-based GPs with different content of RDX (a) blank sample, (b) 0%, (c) 5%, (c) 10% and (c) 15%.

# 3. Thermal analysis


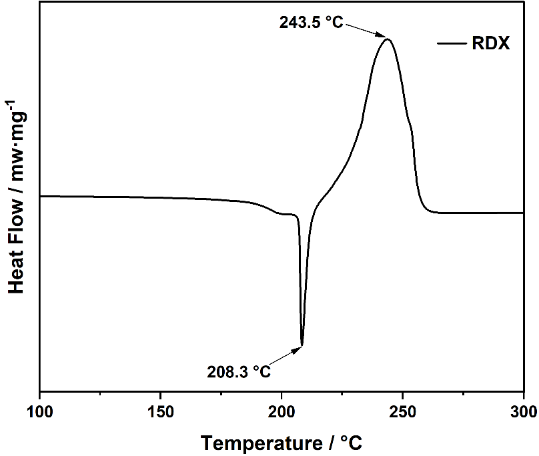


Fig. S3. The DSC curves of the RDX at heating rates of 10 K·min-1.


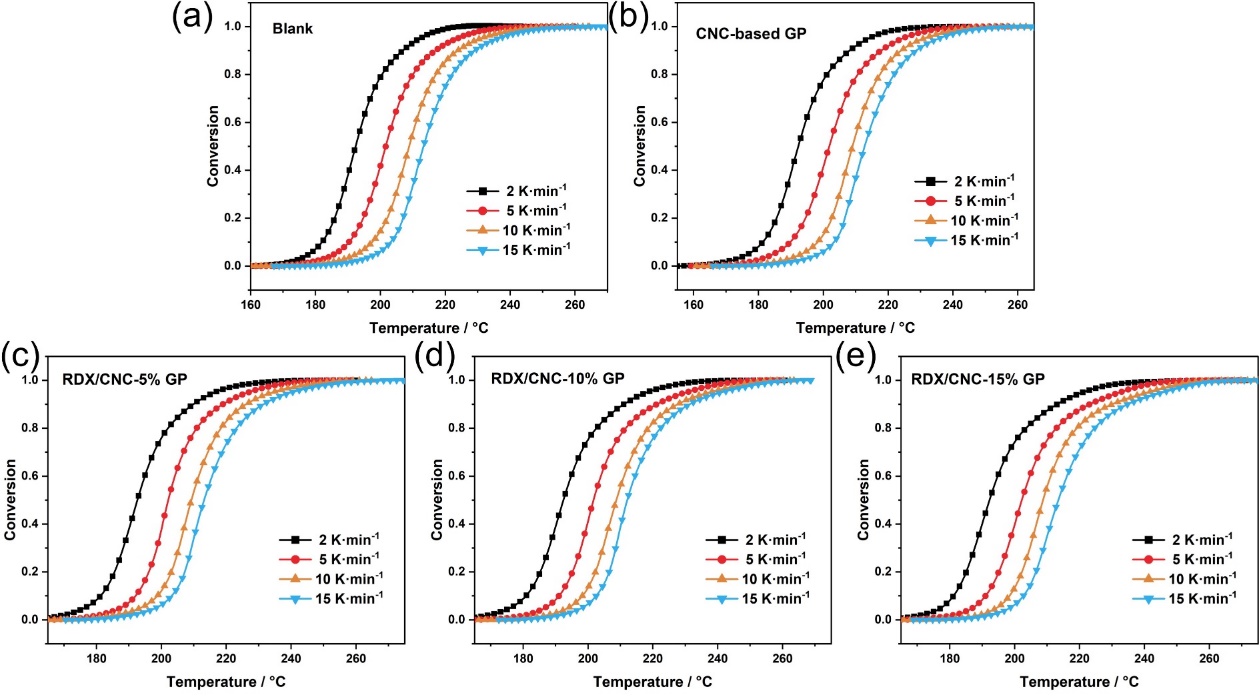


Fig. S4. The conversion variation α of the obtained propellants.


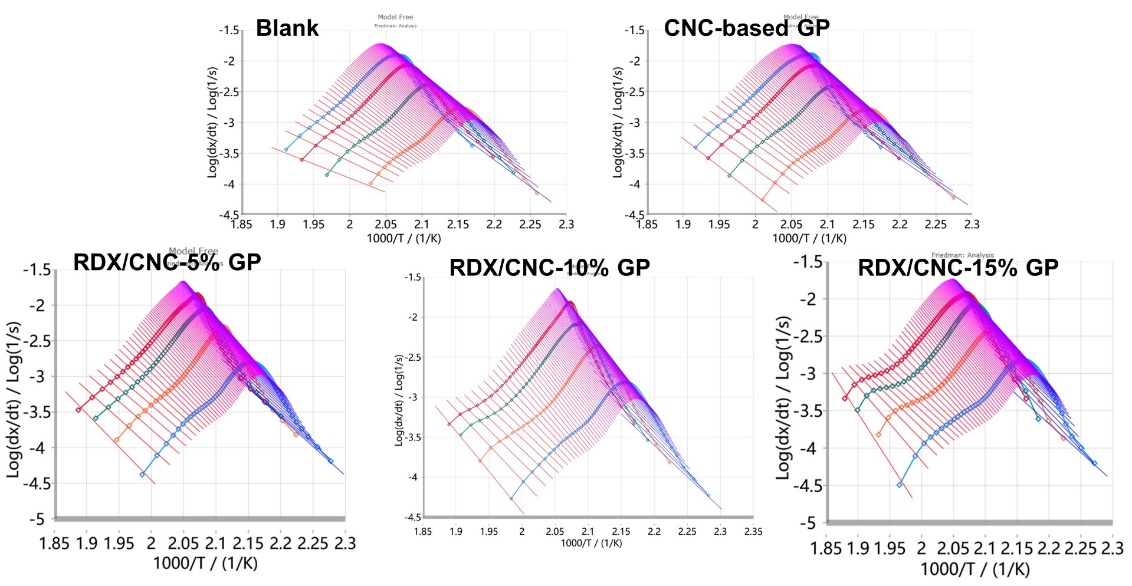


Fig. S5. The Log *A* of propellants of the calculation process obtained by Friedman method.


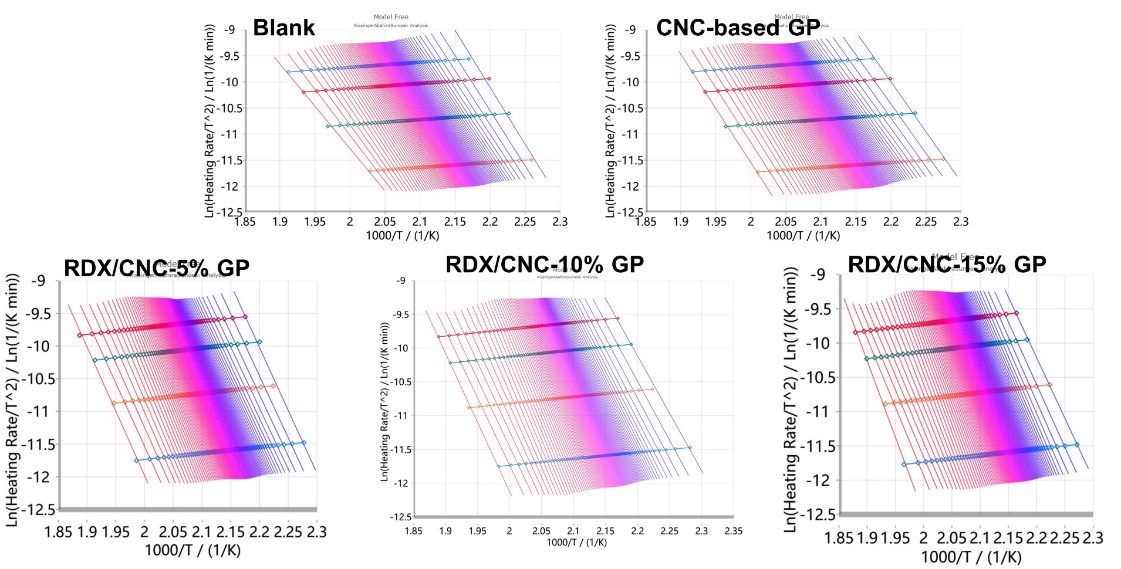


**Fig. S6.** The Log A of the calculation process obtained by KAS method.


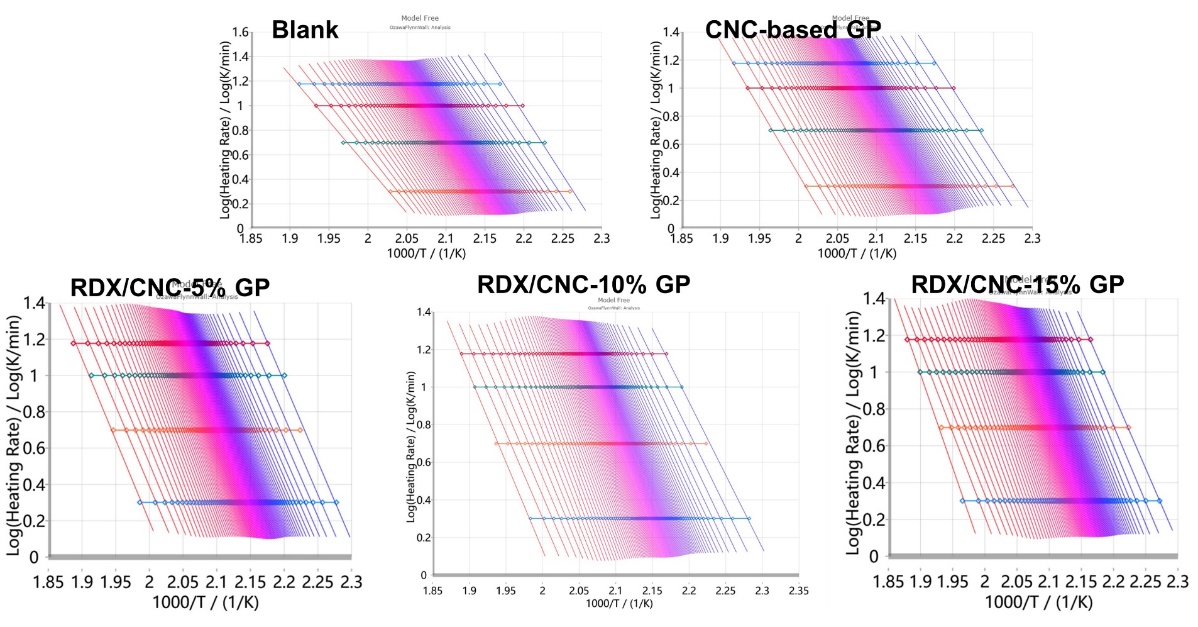


Fig. S7. The Log A of the calculation process obtained by OFW method.

# 4. Characterization

The mechancial properties of propellants were tested with regard to impact strengths with five times of each sample in each time, and the average values were reported. The impact strengths tests were conducted on a drop weight impact testing machine (American Instron, Dynatup 9250HV). The grains were machined to a length of 60 mm.

Impact strength test

Eq. S1

In Eq. S1, *a*k is the impact strength test of sample, kJ·m-2;

*A*, impact energy consumed during test fracture, J;

*D*, outer diameter of tubular propellant sample, mm;

*d*, Inner diameter of tubular propellant sample, mm.

The closed vessel tests performed using a 111.6 cm3 vessel reflected a constant volume combustion. A 1.0 g NC powder with 10.98 MPa ignition pressure was used as the ignitor. The loading density of each sample was 0.2 g/cm3 at -40 °C, 20 °C and 50 °C. In terms of the gunpowder impetus, which was tested with two loading density of each sample about 0.2 g/cm3 and 0.12 g/cm3 at 20 °C. The burning pressure (*p*), burning time (*t*), burning rate (*u*), dynamic vivacity (*L*), and relative pressure (*B*) were used to characterize the stability of the combustion (*p*-*t* curves), the change rule in burning rate (*u*-*p* curves), and burning progressive state of the burning surface (*L*-*B* curves).

# 5. Burning parameters analysis of gun propellant


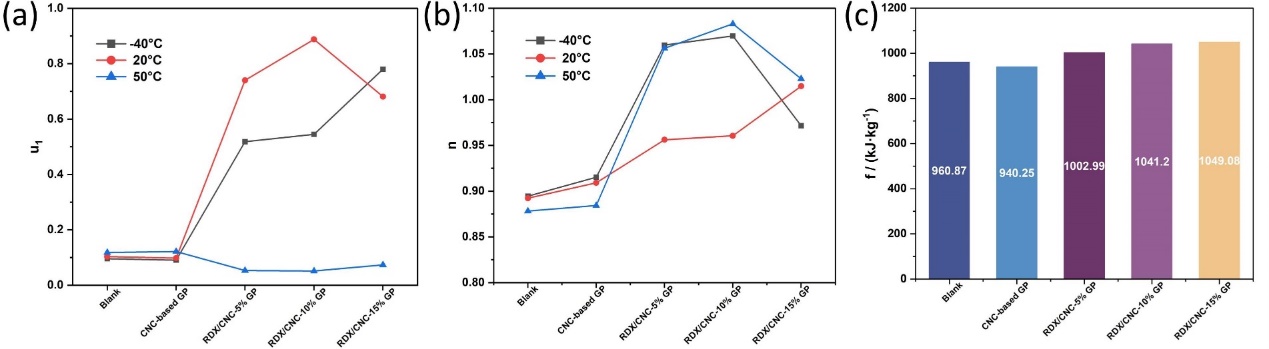


Fig. S8. The burning rate coefficient (*u*1), pressure exponent (*n*) and gunpowder impetus of propellants in the combustion process.

# 6. Molecular dynamics simulation of propellant


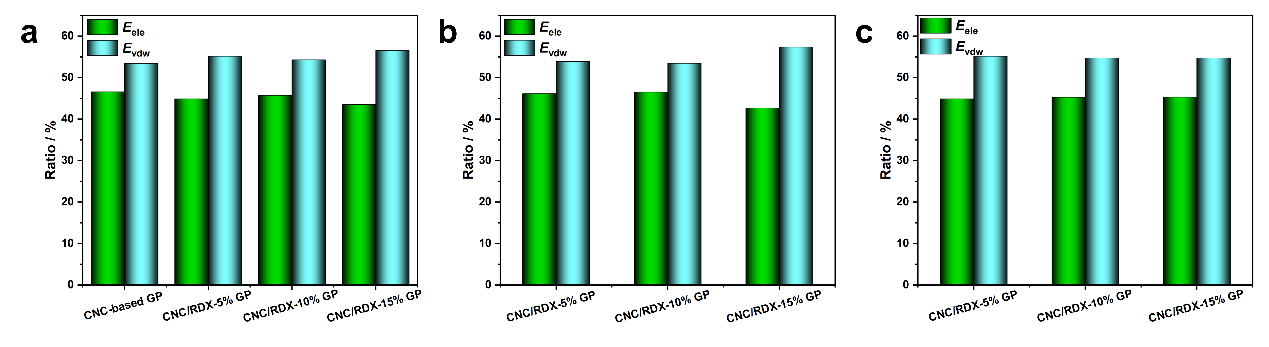


**Fig. S9**. The H bond number and RDF between CNC13.1% and CNC12.0% of CNC/RDX propellants.


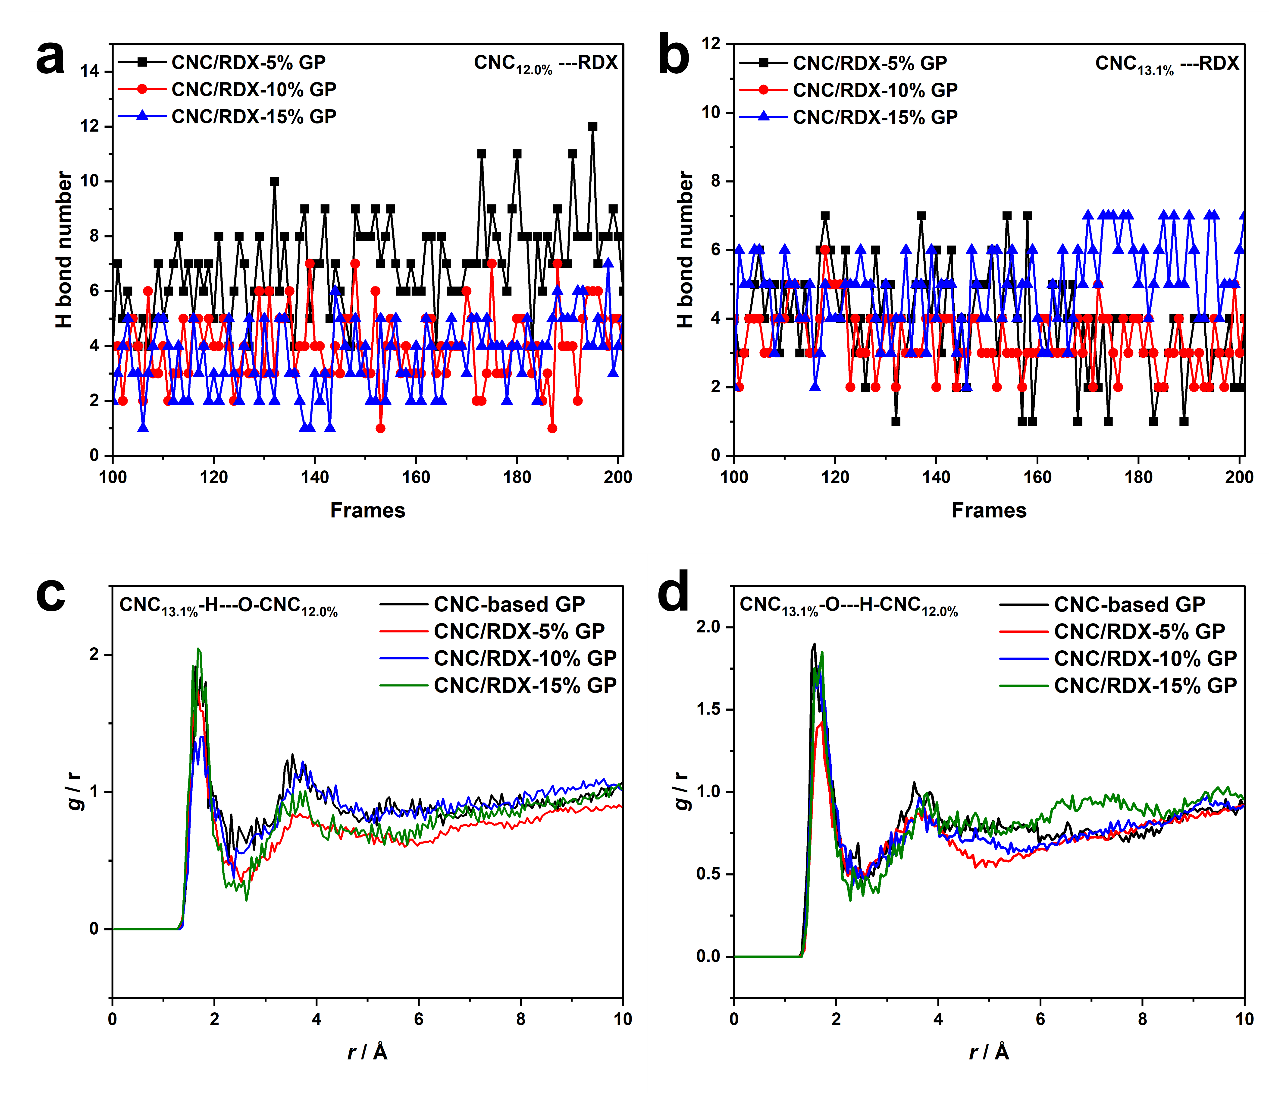


**Fig. S10**. The ratio of electrostatic interactions and van der Waals interactions between each CNC/RDX propellant samples.
